# Supplementary material for: Analytical Approximation of the Definite Chapman Integral for Arbitrary Zenith Angle
Source: Copernicus journal article supplement (doi:10.5194/egusphere-2023-3112), 2024-01-15
Supplement: Supplementary file [file egusphere-2023-3112-AC1-supplement.pdf]

Planetary Aeronomy: ...  
By Siegfried Bauer, H...

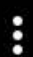

Planetary Aeronomy

Atmosphere Environme

By Siegfried Bauer, Helmut Lammer

Preview

Search inside

Overview

Get the book

About this edition

ISBN: 9783662093627, 3662

Published: March 9, 2013

Publisher: Springer Berlin Heide

Author: Siegfried Bauer, Helmu

Create Citation

Table of

Planetary Aeronomy is a modern and cor that govern the formation and evolution c permits consideration of the growing nur become possible over the next decades. which are relevant for the evolution of pla useful scaling laws and analytical expres the evolution of terrestrial planets and th used both as graduate textbook for studer for researchers in the field.

Source: Publisher

Get book

RIIV DIGITAL

I.1 Extreme Ultraviolet Radiation (EUV) and X-Rays

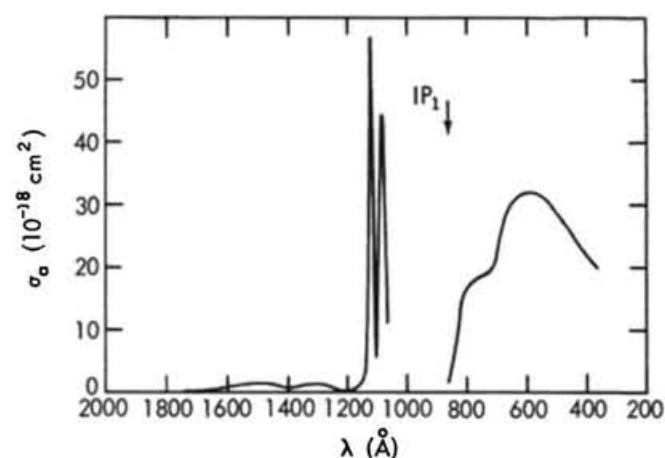

Fig. 1.8. Absorption cross-section of CO<sub>2</sub> from experimental data (after E. W. McDaniel [9]).

A number of analytical approximations to the Chapman function have been developed, including the extension to a constant scale height gradient  $\beta$  (cf. Sect. II.1). For an isothermal atmosphere a useful approximation of the Chapman function is given in terms of the tabulated error function

$$\begin{aligned} \text{Ch} \left( x, \frac{\pi}{3} \leq \chi \leq \frac{\pi}{2} \right) &\cong \left( \frac{\pi x}{2} \right)^{\frac{1}{2}} \left\{ 1 - \text{erf} \left( \frac{x^{\frac{1}{2}} \cos \chi}{\sqrt{2}} \right) \right\} \exp \left( \frac{x \cos^2 \chi}{2} \right) \\ \text{Ch} \left( x, \chi \geq \frac{\pi}{2} \right) &\cong \left( \frac{\pi x}{2} \sin \chi \right)^{\frac{1}{2}} \left\{ 1 + \text{erf} \left( \frac{x^{\frac{1}{2}} \cos \chi}{\sqrt{2}} \right) \right\} \exp \left( \frac{x \cos^2 \chi}{2} \right) \end{aligned} \quad (1.9)$$

where  $x = R/H = (R_0 + h)/H$  with  $H$  the scale height and  $R_0$  the planetary radius. The *Chapman function* for different values of  $x$  and its comparison with  $\sec \chi$  is shown in Fig. 1.9.

For  $\chi = 90^\circ$ ,  $\text{Ch}(x, \pi/2) = (x\pi/2)^{\frac{1}{2}}$ , representing the ratio of the total content in the line of sight to the vertical content of an atmospheric constituent, a quantity of interest in occultation experiments. At high enough altitudes where the optical depth is small the exponential factor in (1.9) can be neglected and the ion production function in this “low attenuation region” assumes the simple form

$$q = J(\sigma_i, \lambda) n_j(z) \quad (1.10)$$

where  $J = \langle \sigma_i \Phi_\infty \rangle$  is the photoionization rate coefficient (or frequency of ionization  $\nu_{\text{ion}}$ , [ $\text{sec}^{-1}$ ]). The ionization coefficient is based on the averaged ionization cross-sections and photon fluxes over all pertinent wavelengths. For the light atmospheric constituents H and He, which will make up the main constituents of planetary exospheres, the ionization coefficients are listed for Venus, Earth and Mars in Table 1.8. Since many wavelengths will contribute
